# Supplementary material for: Bimolecular rate constants for diffusion in ionic liquidsElectronic supplementary information (ESI) available: Fig. S1: isokinetic plot obtained for the energy transfer reaction of 3BP* and N in five ionic liquids, toluene and acetonitrile. See http://www.rsc.org/suppdata/cc/b2/b202944h/
Source: Royal Society of Chemistry journal article supplement (doi:10.1039/b202944h), 2002-07-26
Supplement: b202944h.doc [file b202944h.doc]

**Supplementary Material (ESI) for Chemical Communications**

**This journal is © The Royal Society of Chemistry 2002**

**Fig. S1** Isokinetic plot obtained for the energy transfer reaction of **3Bp*** and **N** in five ionic liquids, toluene and acetonitrile
